# Supplementary material
Source: bioRxiv or medRxiv preprint supplement (https://www.medrxiv.org/highwire/filestream/83939/field_highwire_adjunct_files/0/2020.05.27.20114512-1.pdf)

# **Diagnostic accuracy of a host response point-of-care test in patients with suspected COVID-19**

Tristan W Clark<sup>1,2,3,4\*</sup>, Nathan J Brendish<sup>1, 2</sup>, Stephen Poole<sup>1,2,3</sup>, Vasanth V Naidu<sup>2</sup>, Christopher Mansbridge<sup>2</sup>, Nicholas Norton<sup>2</sup>, Helen Wheeler<sup>3</sup>, Laura Presland<sup>3</sup> and Sean Ewings<sup>5</sup>

## **Online Data Supplement**

**Table E1. Pathogens tested for by QIAstat-Dx Respiratory SARS-CoV-2 Panel**

| <b>Viruses</b>                  | <b>Bacteria</b>               |
|---------------------------------|-------------------------------|
| SARS-CoV-2 (Covid-19)           | <i>Mycoplasma pneumonia</i>   |
| Influenza A                     | <i>Legionella pneumophila</i> |
| Influenza A subtype H1N1/2009   | <i>Bordatella pertussis</i>   |
| Influenza A subtype H1          |                               |
| Influenza A subtype H3          |                               |
| Influenza B                     |                               |
| Coronavirus 229E                |                               |
| Coronavirus HKU1                |                               |
| Coronavirus NL63                |                               |
| Coronavirus OC43                |                               |
| Parainfluenza 1                 |                               |
| Parainfluenza 2                 |                               |
| Parainfluenza 3                 |                               |
| Parainfluenza 4                 |                               |
| Respiratory Syncytial Virus A/B |                               |
| Human Metapneumovirus A/B       |                               |
| Adenovirus                      |                               |
| Bocavirus                       |                               |
| Rhino/Enterovirus               |                               |

## **File E1. Methods and sample size justification for multivariable analysis**

To further assess the diagnostic value of FebriDx MxA detection in practice, a multivariable logistic regression model was developed, including FebriDx MxA result, age, sex and pre-specified clinical measures of; supplementary O<sub>2</sub>, vital signs (respiratory rate and temperature) and symptoms (presence or absence of cough, fever and shortness of breath), with PCR positivity or negativity as the binary outcome. Choice of covariates were informed by clinical expertise and recommendations in the literature. Continuous variables were mean-centred and their relationship with outcome was assessed using restricted cubic splines to establish a suitable form for the multivariable model. Overall performance (Nagelkerke's R<sup>2</sup>; Brier score – sum of squared differences between predicted and observed outcome), discrimination (c-statistic/area under curve) and a calibration plot are presented for this model (perfect fit is represented by all points lying on the 45-degree line). Internal validation was performed using bootstrap resampling to provide optimism-adjusted measures of discrimination (area under the curve; AUC) and calibration (calibration intercept and slope). Analysis was carried out in Stata v16.0.

Nine variables were expected to be included in the multivariable model. Riley et al. suggest three criteria for sample size considerations in multivariable predictive models, where n is chosen to: 1) limit optimism in predictor effects (represented by a shrinkage factor >0.9; this is to avoid overfitting, which can result in a model that performs well in the sample it is derived from, but does not perform well under other samples/external validation), 2) ensure a small difference ( $\leq 0.05$ ) between apparent and adjusted Nagelkerke's R<sup>2</sup> (a measure of proportion of variance explained in the outcome; again to avoid overfitting) and 3) provide a

precise estimate of overall risk. With  $n=236$  and prevalence of 40%, overall risk could be estimated within 6.5%; fixing shrinkage to 0.9 (as recommended) and with  $R^2$  of 0.3, the sample size of 236 would meet all three criteria (based on `pmsampsize` command in Stata).  $R^2$  was anticipated to be much higher, given the nature of the diagnostic test; for  $R^2$  of 0.65, this would allow all criteria to be met under the assumption that we might estimate 15 parameters based on modelling continuous variables, using restricted cubic splines.

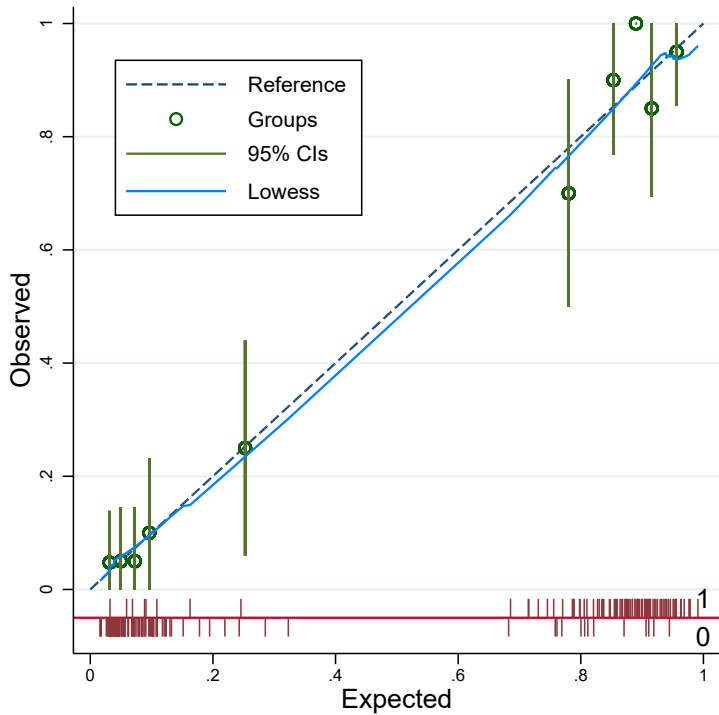

Supplement: Supplementary file [file 2020.05.27.20114512-1.pdf]
